# Supplementary material for: Topological isolation of developmental regulators in mammalian genomes
Source: PubMed Central journal article supplement (PMC8361032; doi:10.1038/s41467-021-24951-7), 2021-08-12
Supplement: 41467_2021_24951_MOESM2_ESM.pdf [file 41467_2021_24951_MOESM2_ESM.pdf]

## **Description of Additional Supplementary Files**

File name: Supplementary Data 1.

Description: Data summary of HUES64 Hi-C.

File name: Supplementary Data 2.

Description: CTCF loop domains in HuES64.

File name: Supplementary Data 3.

Description: Capture Hi-C summary.

File name: Supplementary Data 4.

Description: Constitutive CTCF loop domain.

File name: Supplementary Data 5.

Description: Datasets used in this study.
